# Supplementary material for: The impact of multi-decadal changes in VOC speciation on urban ozone chemistry: a case study in Birmingham, United Kingdom
Source: Copernicus journal article supplement (doi:10.5194/acp-24-6219-2024), 2024-05-28
Supplement: Supplementary file 1 [file acp-24-6219-2024-supplement.pdf]

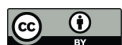

*Supplement of*

## **The impact of multi-decadal changes in VOC speciation on urban ozone chemistry: a case study in Birmingham, United Kingdom**

**Jianghao Li et al.**

*Correspondence to:* Jianghao Li ([cfm531@york.ac.uk](mailto:cfm531@york.ac.uk))

The copyright of individual parts of the supplement might differ from the article licence.

## **Table Captions**

**Table S1.** Species quantified and their corresponding quantification method used in this study.

**Table S2.** Average mixing ratio in ppbv and effective carbon number (ECN) of the measured VOCs at Birmingham Supersite over August, 2022.

**Table S3.** Descriptive statistics (Mean  $\pm$  SD) of concentrations of the measured air pollutants and meteorological parameters at Birmingham Supersite.

**Table S4.** Average mixing ratio (ppbv) of the top 10 species in selected periods at Birmingham Supersite.

**Table S5.** Relative contributions (%) of ozone precursors emitted from the six emission inventory sectors.

**Table S1.** Species quantified and their corresponding quantification method used in this study.

| <b>Species</b>          | <b>Quantification method</b>                       |
|-------------------------|----------------------------------------------------|
| ethane                  | 4 ppbv gas standard cylinders                      |
| propane                 | 4 ppbv gas standard cylinders                      |
| i-butane                | 4 ppbv gas standard cylinders                      |
| n-butane                | 4 ppbv gas standard cylinders                      |
| i-pentane               | 4 ppbv gas standard cylinders                      |
| n-pentane               | 4 ppbv gas standard cylinders                      |
| 2-methylpentane         | 4 ppbv gas standard cylinders                      |
| hexane                  | 4 ppbv gas standard cylinders                      |
| heptane                 | 4 ppbv gas standard cylinders                      |
| i-octane                | 4 ppbv gas standard cylinders                      |
| ethene                  | 4 ppbv gas standard cylinders                      |
| propene                 | 4 ppbv gas standard cylinders                      |
| t-2-butene              | 4 ppbv gas standard cylinders                      |
| 1-butene                | 4 ppbv gas standard cylinders                      |
| c-2-butene              | 4 ppbv gas standard cylinders                      |
| 1,3-butadiene           | 4 ppbv gas standard cylinders                      |
| t-2-pentene             | 4 ppbv gas standard cylinders                      |
| c-2-pentene             | 4 ppbv gas standard cylinders                      |
| isoprene                | 4 ppbv gas standard cylinders                      |
| acetylene               | 4 ppbv gas standard cylinders                      |
| benzene                 | 4 ppbv gas standard cylinders                      |
| toluene                 | 4 ppbv gas standard cylinders                      |
| ethylbenzene            | 4 ppbv gas standard cylinders                      |
| m-xylene                | 4 ppbv gas standard cylinders                      |
| p-xylene                | 4 ppbv gas standard cylinders                      |
| o-xylene                | 4 ppbv gas standard cylinders                      |
| 1,3,5-trimethoxybenzene | 4 ppbv gas standard cylinders                      |
| 1,2,4-trimethoxybenzene | 4 ppbv gas standard cylinders                      |
| 1,2,3-trimethoxybenzene | 4 ppbv gas standard cylinders                      |
| cyclopentane            | effective carbon number using toluene as reference |
| 3-methylpentane         | effective carbon number using toluene as reference |
| nonane                  | effective carbon number using toluene as reference |
| i-butene                | effective carbon number using toluene as reference |
| acetaldehyde            | effective carbon number using toluene as reference |
| acetone                 | effective carbon number using toluene as reference |
| methanol                | effective carbon number using toluene as reference |
| ethanol                 | effective carbon number using toluene as reference |

**Table S2.** Average mixing ratio in ppbv and effective carbon number (ECN) value of the measured VOCs at Birmingham Supersite over August, 2022.

|                  | <b>Species</b>          | <b>Mean</b>  | <b>SD</b> | <b>ECN</b> |      |
|------------------|-------------------------|--------------|-----------|------------|------|
| <b>Alkanes</b>   | ethane                  | 1.69         | 1.48      | –          |      |
|                  | propane                 | 0.65         | 0.57      | –          |      |
|                  | i-butane                | 0.27         | 0.27      | –          |      |
|                  | n-butane                | 0.50         | 0.46      | –          |      |
|                  | cyclopentane            | 0.03         | 0.04      | 5.00       |      |
|                  | i-pentane               | 0.19         | 0.17      | –          |      |
|                  | n-pentane               | 0.09         | 0.10      | –          |      |
|                  | 2-methylpentane         | 0.05         | 0.05      | –          |      |
|                  | 3-methylpentane         | 0.03         | 0.03      | 5.00       |      |
|                  | hexane                  | 0.03         | 0.03      | –          |      |
|                  | heptane                 | 0.02         | 0.02      | –          |      |
|                  | i-octane                | 0.02         | 0.02      | –          |      |
|                  | nonane                  | 0.06         | 0.03      | 9.00       |      |
| <b>Alkenes</b>   | ethene                  | 0.26         | 0.20      | –          |      |
|                  | propene                 | 0.10         | 0.08      | –          |      |
|                  | t-2-butene              | 0.01         | 0.01      | –          |      |
|                  | 1-butene                | 0.02         | 0.02      | –          |      |
|                  | i-butene                | 0.02         | 0.01      | 4.00       |      |
|                  | c-2-butene              | 0.00         | 0.00      | –          |      |
|                  | 1,3-butadiene           | 0.01         | 0.01      | –          |      |
|                  | t-2-pentene             | 0.00         | 0.01      | –          |      |
|                  | c-2-pentene             | 0.01         | 0.01      | –          |      |
|                  | isoprene                | 0.12         | 0.13      | –          |      |
| <b>Alkyne</b>    | acetylene               | 0.11         | 0.06      | –          |      |
| <b>Aromatics</b> | benzene                 | 0.07         | 0.05      | –          |      |
|                  | toluene                 | 0.16         | 0.14      | –          |      |
|                  | ethylbenzene            | 0.04         | 0.04      | –          |      |
|                  | m-xylene                | 0.11         | 0.12      | –          |      |
|                  | p-xylene                | 0.04         | 0.04      | –          |      |
|                  | o-xylene                | 0.04         | 0.05      | –          |      |
|                  | 1,3,5-trimethoxybenzene | 0.01         | 0.01      | –          |      |
|                  | 1,2,4-trimethoxybenzene | 0.05         | 0.06      | –          |      |
|                  | 1,2,3-trimethoxybenzene | 0.01         | 0.02      | –          |      |
|                  | <b>OVOCs</b>            | acetaldehyde | 1.09      | 0.59       | 1.00 |
|                  |                         | acetone      | 2.21      | 1.13       | 2.00 |
| methanol         |                         | 3.72         | 2.35      | 0.75       |      |
| ethanol          |                         | 1.79         | 1.60      | 1.50       |      |

**Table S3.** Descriptive statistics (Mean  $\pm$  SD) of concentrations of the measured air pollutants and meteorological parameters in selected periods.

| <b>Air pollutants (ppbv)</b>    | <b>Initial Period</b> | <b>O<sub>3</sub> Period</b> | <b>Clear-out Period</b> |
|---------------------------------|-----------------------|-----------------------------|-------------------------|
| O <sub>3</sub>                  | 21.6 $\pm$ 8.5        | 31.5 $\pm$ 19.1             | 26.7 $\pm$ 10.7         |
| CO                              | 99.0 $\pm$ 57.7       | 120.4 $\pm$ 34.5            | 102.3 $\pm$ 29.9        |
| NO                              | 0.6 $\pm$ 0.6         | 0.8 $\pm$ 2.0               | 0.6 $\pm$ 1.1           |
| NO <sub>2</sub>                 | 2.5 $\pm$ 3.7         | 7.6 $\pm$ 7.8               | 3.6 $\pm$ 4.1           |
| <b>Parameter</b>                | <b>Initial Period</b> | <b>O<sub>3</sub> Period</b> | <b>Clear-out Period</b> |
| temperature (°C)                | 18.2 $\pm$ 4.1        | 20.8 $\pm$ 5.3              | 18.1 $\pm$ 2.8          |
| relatively humidity (%)         | 65.5 $\pm$ 16.9       | 58.3 $\pm$ 19.1             | 75.7 $\pm$ 15.6         |
| wind speed (m s <sup>-1</sup> ) | 1.7 $\pm$ 1.2         | 1.5 $\pm$ 0.9               | 1.9 $\pm$ 1.3           |

**Table S4.** Average mixing ratio (ppbv) of the top 10 species in selected periods at Birmingham Supersite.

| Ranking | Initial period |               | O <sub>3</sub> period |               | Clear-out period |               |
|---------|----------------|---------------|-----------------------|---------------|------------------|---------------|
|         | Species        | Concentration | Species               | Concentration | Species          | Concentration |
| 1       | methanol       | 2.60 ± 0.90   | methanol              | 6.45 ± 2.03   | methanol         | 3.92 ± 1.82   |
| 2       | acetone        | 1.66 ± 0.53   | acetone               | 3.90 ± 0.80   | acetone          | 1.80 ± 0.94   |
| 3       | ethane         | 1.43 ± 1.40   | ethanol               | 3.33 ± 2.27   | ethanol          | 1.42 ± 0.01   |
| 4       | ethanol        | 1.40 ± 1.08   | ethane                | 2.32 ± 1.79   | ethane           | 1.22 ± 0.88   |
| 5       | acetaldehyde   | 0.85 ± 0.31   | acetaldehyde          | 2.00 ± 0.38   | acetaldehyde     | 0.82 ± 0.41   |
| 6       | propane        | 0.48 ± 0.37   | propane               | 1.05 ± 0.84   | propane          | 0.49 ± 0.38   |
| 7       | n-butane       | 0.37 ± 0.31   | n-butane              | 0.75 ± 0.57   | n-butane         | 0.35 ± 0.31   |
| 8       | ethene         | 0.21 ± 0.17   | i-butane              | 0.39 ± 0.32   | i-butane         | 0.24 ± 0.33   |
| 9       | i-butane       | 0.19 ± 0.16   | ethene                | 0.35 ± 0.20   | ethene           | 0.19 ± 0.14   |
| 10      | isoprene       | 0.13 ± 0.12   | i-pentane             | 0.32 ± 0.23   | i-pentane        | 0.13 ± 0.11   |

**Table S5.** Relative contributions (%) of ozone precursors emitted from the six emission inventory sectors.

|                                   | <b>road<br/>transport</b> | <b>fuel<br/>fugitive</b> | <b>agriculture</b> | <b>industrial<br/>process</b> | <b>combustion</b> | <b>solvents</b> | <b>SUM</b> |
|-----------------------------------|---------------------------|--------------------------|--------------------|-------------------------------|-------------------|-----------------|------------|
| <b>ethane</b>                     | 6.0                       | 48.6                     | 39.1               | 2.1                           | 2.9               | 0.0             | 98.7       |
| <b>butanes</b>                    | 34.9                      | 35.2                     | 0.0                | 1.4                           | 1.2               | 27.0            | 99.8       |
| <b>propanes</b>                   | 82.0                      | 9.9                      | 0.0                | 0.7                           | 0.5               | 6.7             | 99.8       |
| <b>C<sub>&gt;=6</sub> alkanes</b> | 39.5                      | 31.3                     | 0.0                | 2.2                           | 1.5               | 22.8            | 97.2       |
| <b>acetylene</b>                  | 85.8                      | 7.6                      | –                  | 2.7                           | 0.0               | –               | 96.2       |
| <b>ethene</b>                     | 8.6                       | 86.9                     | –                  | 4.5                           | –                 | –               | 100.0      |
| <b>butenes</b>                    | 96.1                      | 0.7                      | –                  | 0.7                           | 1.5               | –               | 99.0       |
| <b>propene</b>                    | 64.1                      | 34.1                     | –                  | 1.8                           | –                 | –               | 100.0      |
| <b>pentenes</b>                   | 100.0                     | –                        | –                  | –                             | –                 | –               | 100.0      |
| <b>1,3-butadiene</b>              | 76.0                      | 3.3                      | –                  | 3.5                           | 11.0              | –               | 93.8       |
| <b>toluene</b>                    | 80.0                      | 3.8                      | 0.3                | 0.6                           | 1.1               | 10.3            | 96.1       |
| <b>xylenes</b>                    | 72.0                      | 1.3                      | 0.3                | 1.0                           | 1.3               | 21.6            | 97.6       |
| <b>other<br/>aromatics</b>        | 71.3                      | 2.9                      | –                  | 1.8                           | 5.3               | 12.6            | 94.0       |
| <b>acetaldehyde</b>               | 69.0                      | –                        | 0.2                | 13.0                          | 0.0               | –               | 82.1       |
| <b>acetone</b>                    | 17.0                      | –                        | –                  | 15.4                          | 0.2               | 65.6            | 98.3       |
| <b>methanol</b>                   | –                         | 0.0                      | –                  | 3.0                           | –                 | 96.8            | 99.8       |
| <b>ethanol</b>                    | 7.3                       | 0.1                      | 11.9               | 48.8                          | 5.8               | 25.3            | 99.1       |
| <b>NO<sub>x</sub></b>             | 33.3                      | –                        | 3.9                | 18.4                          | 28.0              | –               | 83.5       |
| <b>CO</b>                         | 14.5                      | 1.2                      | –                  | 32.3                          | 34.0              | –               | 82.0       |

## Figure Captions

**Figure S1.** Average contributions (%) of different measured VOCs functional groups to the overall measured total of VOCs and the mean concentrations of the sum of all measured VOCs in each of the three periods.

**Figure S2.** Campaign averaged diel mixing ratio of selected VOCs during different periods: ethene, ethanol, toluene, methanol, ethane, acetylene, acetaldehyde, and acetone. The shaded area represents one standard deviation from the mean.

**Figure S3.** Diurnal variations of the modelled average OH reactivity ( $k(\text{OH})$ ) for VOCs, CO, and NO<sub>x</sub> in initial period(a), O<sub>3</sub> period (b), and clear-out period (c).

**Figure S4.** Modelled average chemical budgets of O<sub>3</sub> in the selected periods.

**Figure S5.** Modelled O<sub>3</sub> (a, b, c) and P(O<sub>3</sub>) (d, e, f) with and without all observed photodegradable OVOCs constrained in the selected periods.

**Figure S6.** Emissions of VOCs from anthropogenic sources in the UK between 1990-2019. Data: UK National Atmospheric Emissions Inventory (<https://naei.beis.gov.uk/>, last access 07 September 2023).

**Figure S7.** UK National Atmospheric Emissions Inventory estimated trends (1990-2019) of emissions of selected VOCs.

**Figure S8.** Modelled RIRs for anthropogenic sources in selected periods during 08:00-16:00 LST.



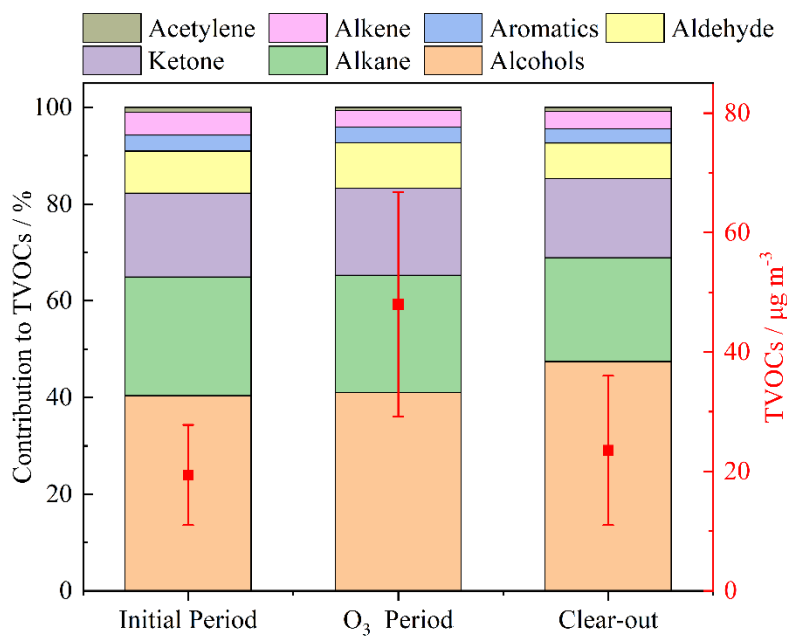

**Figure S1.** Average contributions (%) of different measured VOCs functional groups to the overall measured total of VOCs and the mean concentrations of the sum of all measured VOCs in each of the three periods.

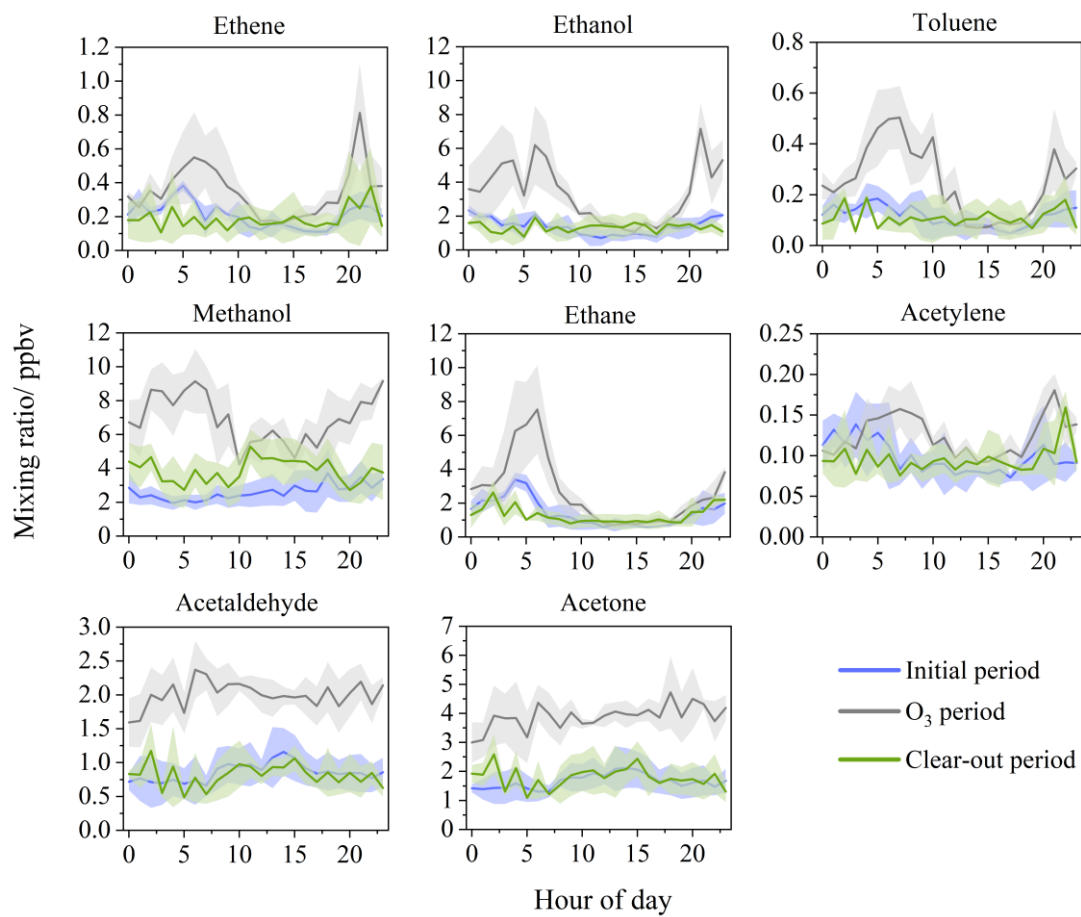

**Figure S2.** Campaign averaged diel mixing ratio of selected VOCs during different periods: ethene, ethanol, toluene, methanol, ethane, acetylene, acetaldehyde, and acetone. The shaded area represents one standard deviation from the mean.

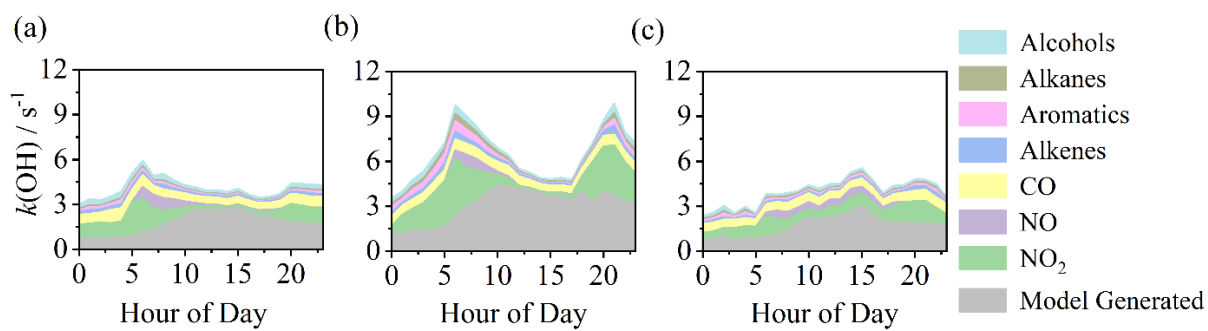

**Figure S3.** Diurnal variations of the modelled average OH reactivity ( $k(\text{OH})$ ) for VOCs, CO, and  $\text{NO}_x$  in initial period(a),  $\text{O}_3$  period (b), and clear-out period (c).

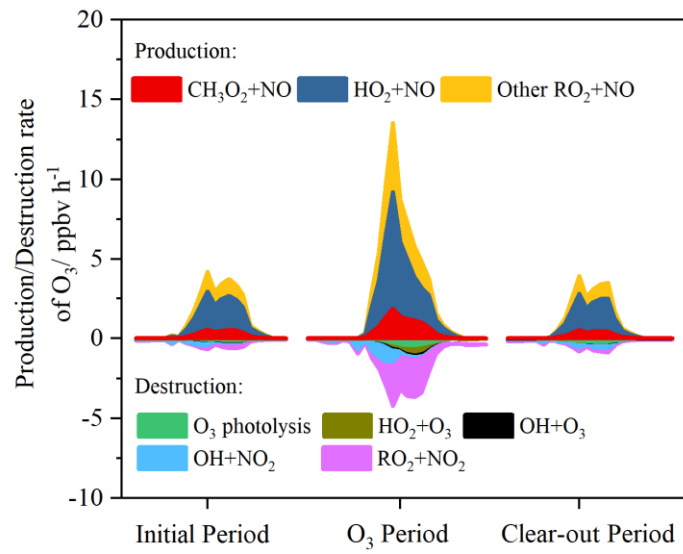

**Figure S4.** Modelled average chemical budgets of  $O_3$  in the selected periods.

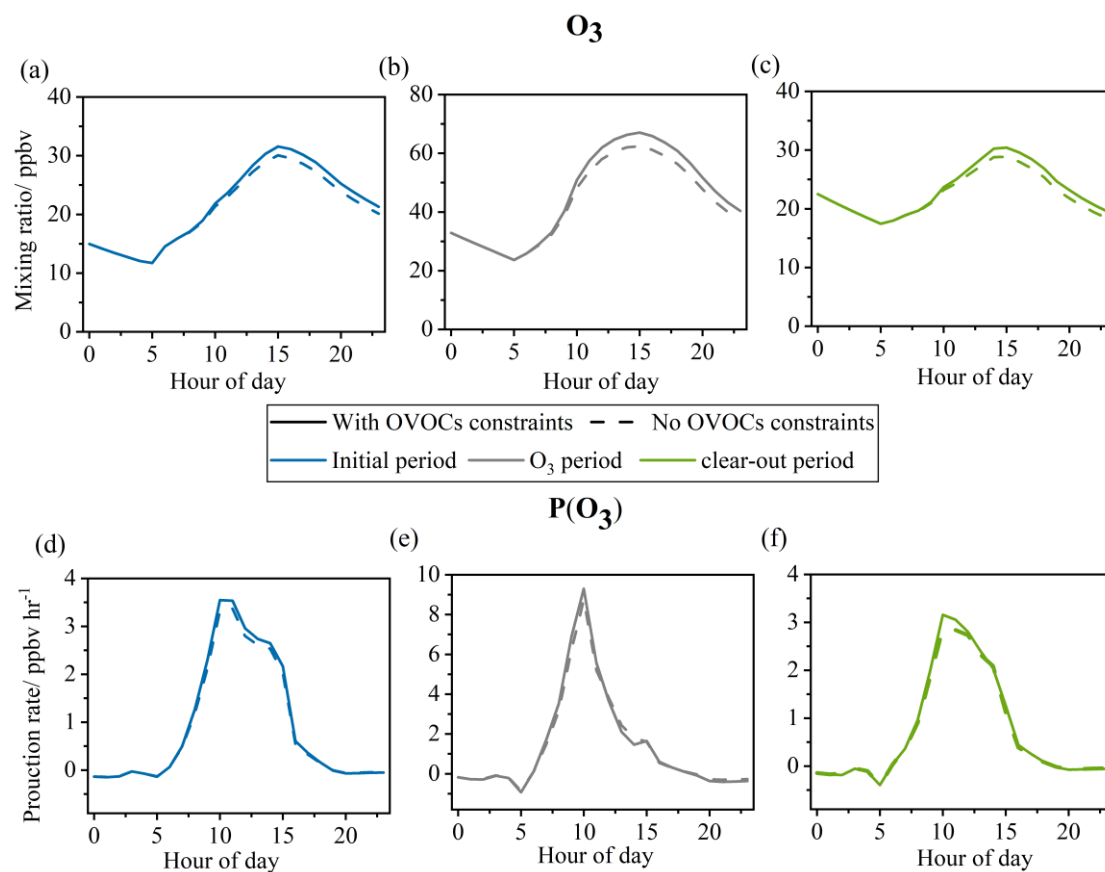

**Figure S5.** Modelled O<sub>3</sub> (a, b, c) and P(O<sub>3</sub>) (d, e, f) with and without all observed photodegradable OVOCs constrained in the selected periods.

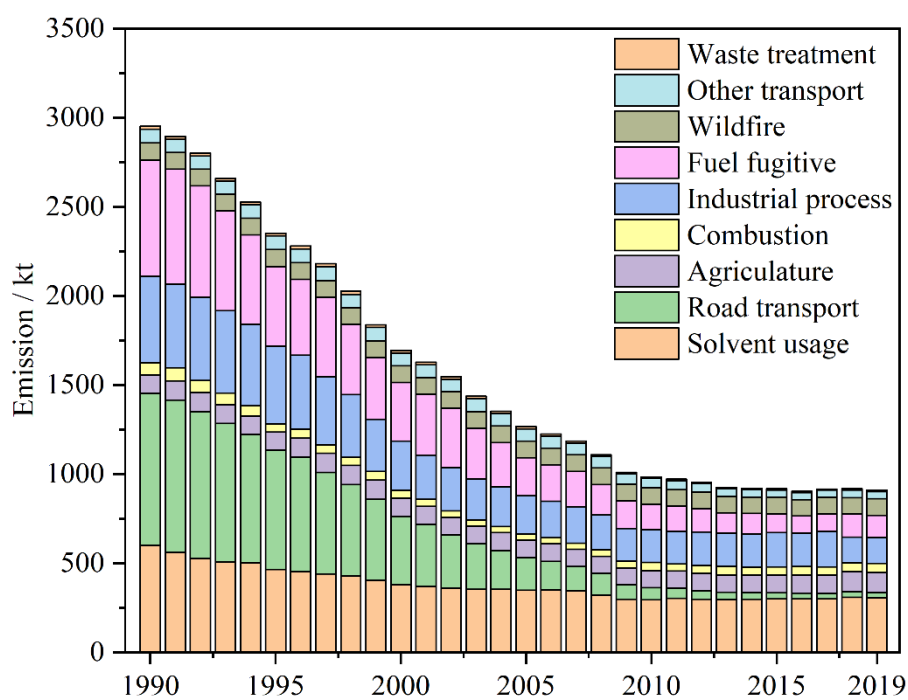

**Figure S6.** Emissions of VOCs from anthropogenic sources in the UK between 1990-2019. Data: UK National Atmospheric Emissions Inventory (<https://naei.beis.gov.uk/>, last access 07 September 2023).

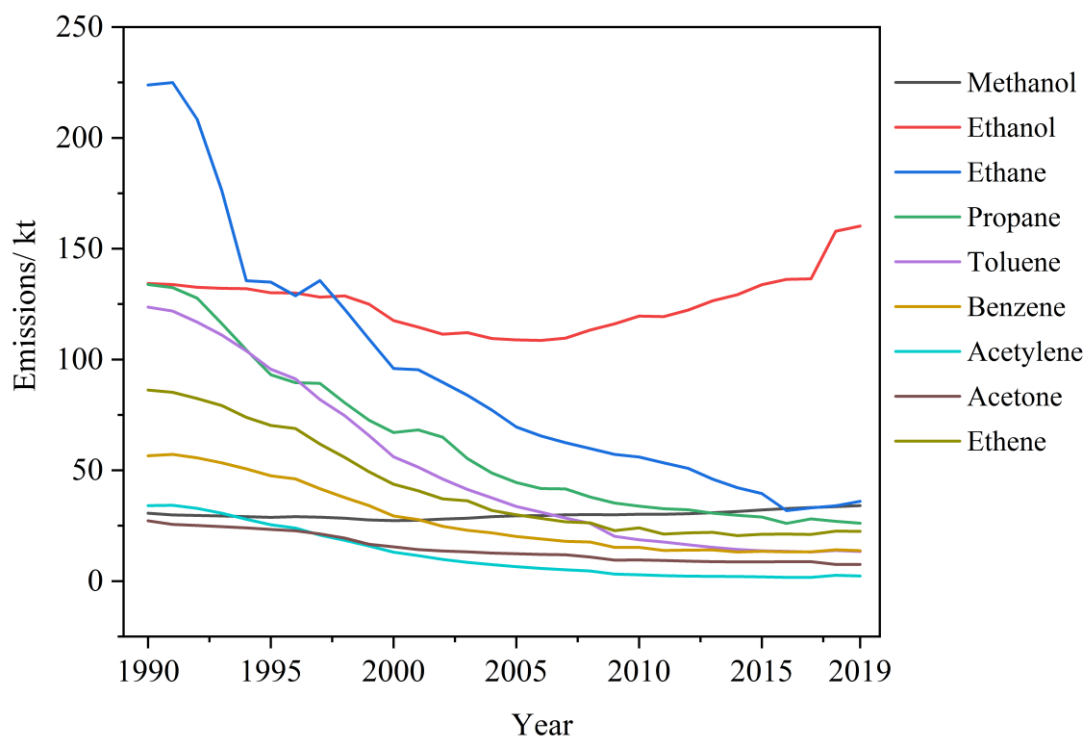

**Figure S7.** UK National Atmospheric Emissions Inventory estimated trends (1990-2019) of emissions of selected VOCs.

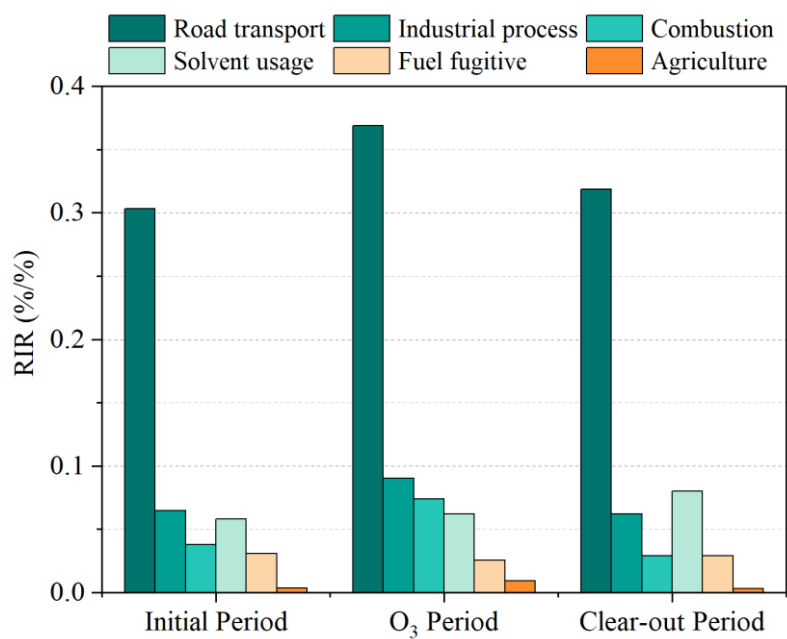

**Figure S8.** Modelled RIRs for anthropogenic sources in selected periods during 08:00-16:00 LST.
